# Supplementary material for: Investigation of the high-temperature redox chemistry of Sr2Fe1.5Mo0.5O6−δvia in situ neutron diffraction
Source: Royal Society of Chemistry journal article supplement (doi:10.1039/c3ta14913g), 2014-01-01

## Supplementary Information

### **Investigation of the high-temperature redox chemistry of $\text{Sr}_2\text{Fe}_{1.5}\text{Mo}_{0.5}\text{O}_{6-\delta}$ via *in situ* neutron diffraction**

Daniel E. Bugaris<sup>1</sup>, Jason P. Hodges<sup>2</sup>, Ashfia Huq<sup>2</sup>, W. Michael Chance<sup>1</sup>, Andreas Heyden<sup>3</sup>, Fanglin Chen<sup>4</sup>, Hans-Conrad zur Loye<sup>1</sup>

<sup>1</sup> *Department of Chemistry and Biochemistry, University of South Carolina, Columbia, SC 29208, USA*

<sup>2</sup> *Neutron Sciences Directorate, Oak Ridge National Laboratory, Oak Ridge, TN 37831, USA*

<sup>3</sup> *Department of Chemical Engineering, University of South Carolina, Columbia, SC 29208, USA*

<sup>4</sup> *Department of Mechanical Engineering, University of South Carolina, Columbia, SC 29208, USA*

**Figure S1** Powder neutron diffraction profiles for  $\text{Sr}_2\text{Fe}_{1.5}\text{Mo}_{0.5}\text{O}_{6-\delta}$  in  $\text{O}_2$  in the temperature range 500-850°C.

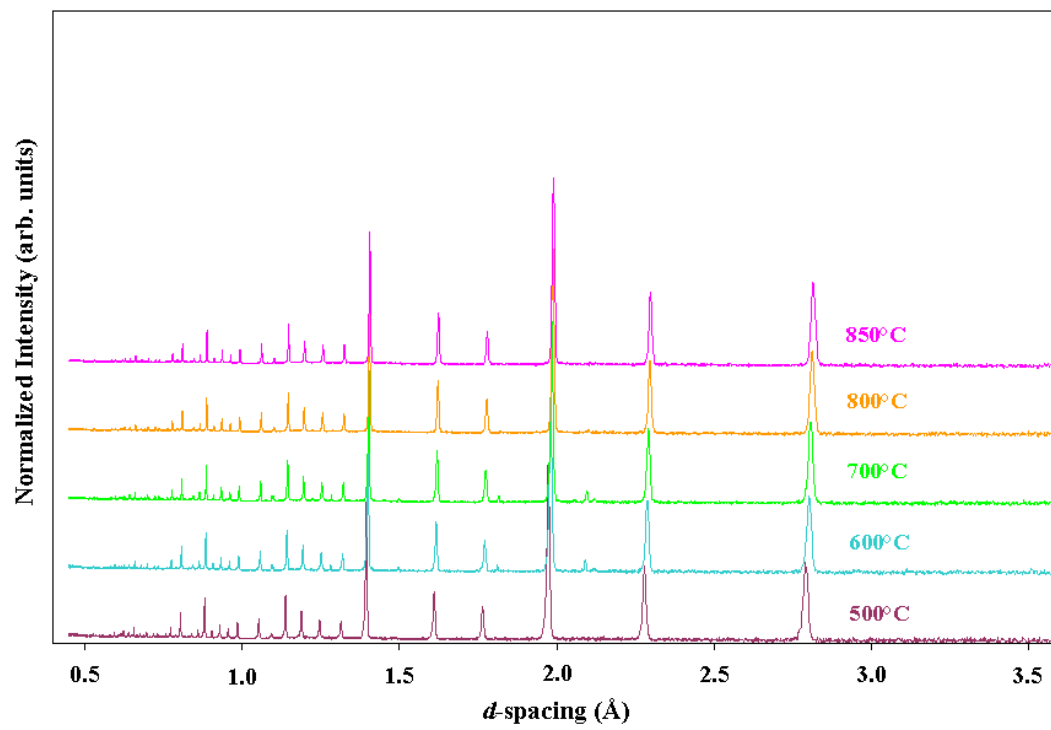

**Figure S2** Observed (black crosses), calculated (red line), and difference (blue line) powder neutron diffraction profile for  $\text{Sr}_2\text{Fe}_{1.5}\text{Mo}_{0.5}\text{O}_{6-\delta}$  in  $\text{O}_2$  at  $850^\circ\text{C}$ , refined in the cubic space group  $Pm\bar{3}m$ . The vertical markers correspond to the allowed Bragg reflections.

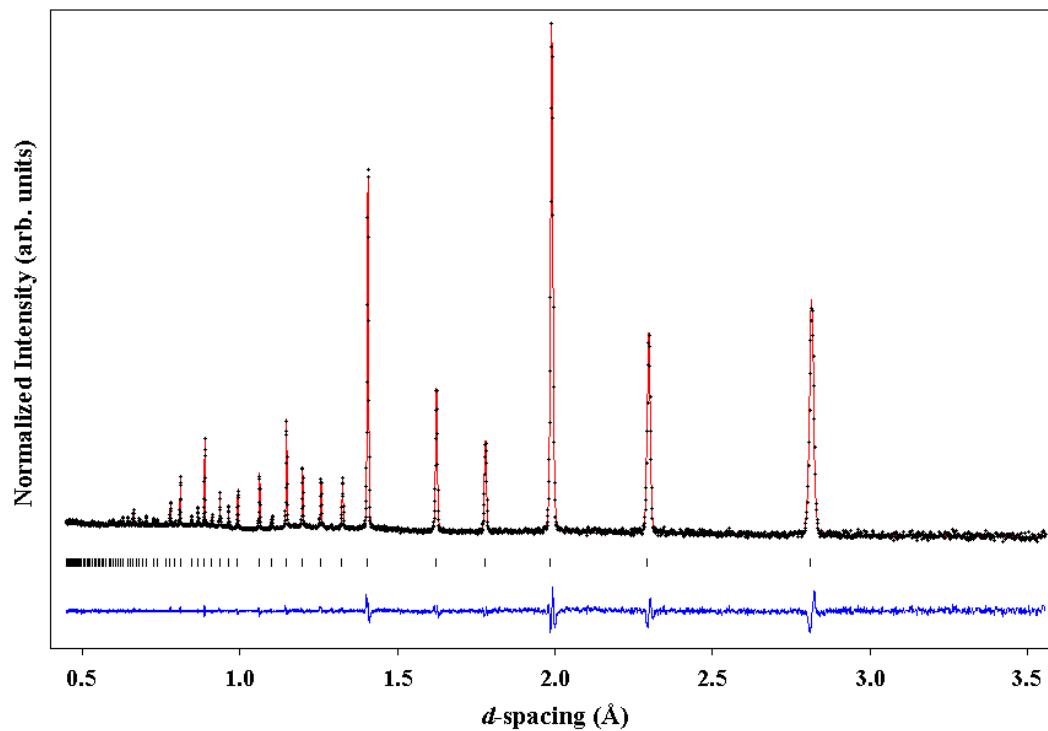

**Figure S3** Observed (black crosses), calculated (red line), and difference (blue line) powder neutron diffraction profile for  $\text{Sr}_2\text{Fe}_{1.5}\text{Mo}_{0.5}\text{O}_{6.8}$  at  $25^\circ\text{C}$  after having been cooled in  $\text{O}_2$ , refined in the tetragonal space group  $I4/mcm$ . The vertical markers correspond to the allowed Bragg reflections.

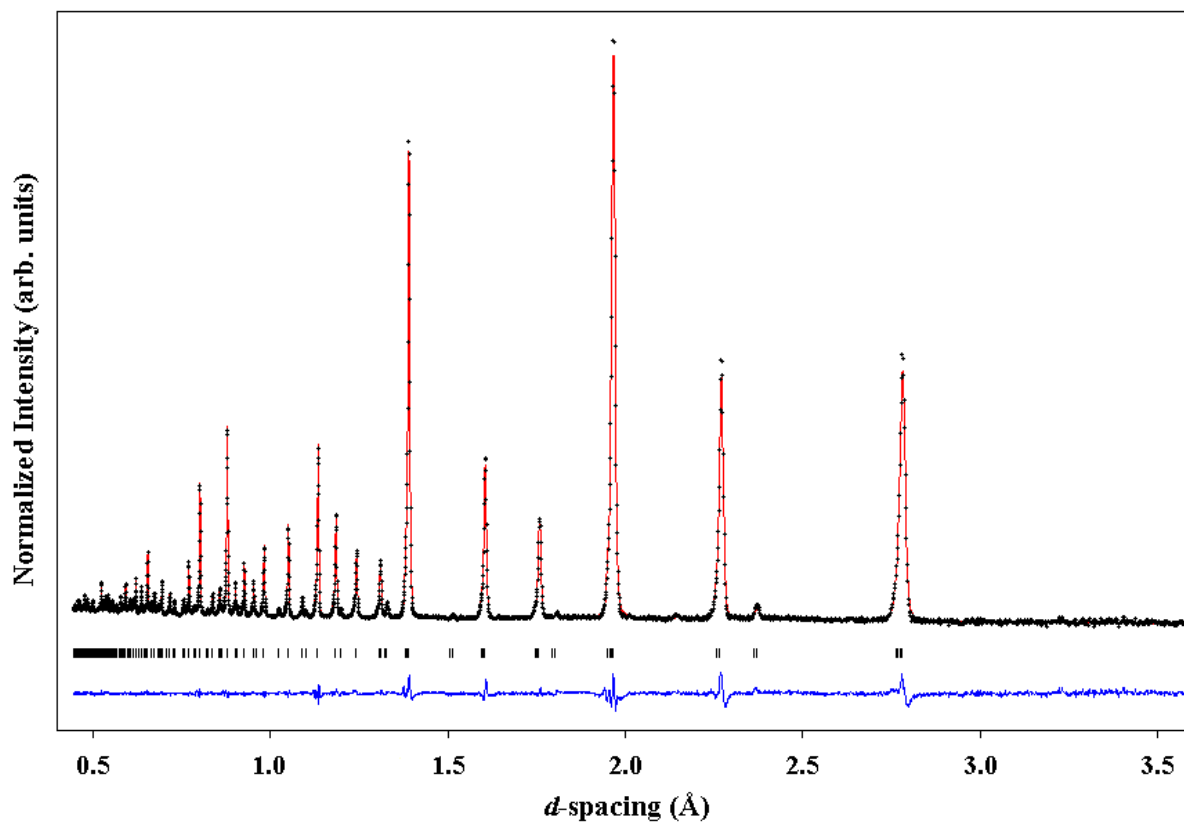

Supplement: c3ta14913g.pdf [file c3ta14913g.pdf]
